# Supplementary material for: Scientific Advances in Diabetes: The Impact of the Innovative Medicines Initiative
Source: Frontiers journal article supplement (doi:10.3389/fmed.2021.688438), 2021-07-06
Supplement: Table_1.pdf [file Table_1.pdf]

## *Detailed description of the projects and its objectives*

**Table 1** – Brief Description of IMI-funded projects in diabetes

| Project                                                                                                                    | Call           | Contribution                                                                                                       | Duration                 | Grant number | Objectives                                                                                                                                                                                                                                                                                                                                                                                                   |
|----------------------------------------------------------------------------------------------------------------------------|----------------|--------------------------------------------------------------------------------------------------------------------|--------------------------|--------------|--------------------------------------------------------------------------------------------------------------------------------------------------------------------------------------------------------------------------------------------------------------------------------------------------------------------------------------------------------------------------------------------------------------|
| <b>SUMMIT:</b><br>Surrogate markers for micro- and macro-vascular hard endpoints for innovative diabetes tools<br>(closed) | IMI 1 – Call 1 | IMI Funding<br>(14 654 559)<br>EFPIA in kind<br>(15 252 050)<br>Other<br>(4 905 472)<br>Total Cost:<br>34 812 081€ | 01/11/2009 to 31/10/2015 | 115006       | (1) Identify and characterize markers associated to diabetic nephropathy, diabetic retinopathy, and Lower Extremity Arterial Disease in both type 1 and type 2 diabetes as well as on cardiovascular disease in type 2 diabetes, to predict risks of developing the complications and monitor the effects of therapeutic interventions.<br>(2) Develop knowledge, procedures, technologies and tools to make |

|                                                                                                                                             |                |                                                                                                                   |                             |        |                                                                                                                                                                                                                                                                                                                                                                                                  |
|---------------------------------------------------------------------------------------------------------------------------------------------|----------------|-------------------------------------------------------------------------------------------------------------------|-----------------------------|--------|--------------------------------------------------------------------------------------------------------------------------------------------------------------------------------------------------------------------------------------------------------------------------------------------------------------------------------------------------------------------------------------------------|
|                                                                                                                                             |                |                                                                                                                   |                             |        | clinical trials testing of novel medications in diabetic complications shorter and more focused.                                                                                                                                                                                                                                                                                                 |
| <b>IMIDIA:</b><br>Improving beta-cell function and identification of diagnostic biomarkers for treatment monitoring in diabetes<br>(closed) | IMI 1 – Call 1 | IMI Funding<br>(8 060 760)<br>EFPIA in kind<br>(16 940 659)<br>Other<br>(2 445 590)<br>Total Cost:<br>27 447 009€ | 01/02/2010 to<br>30/09/2015 | 115005 | (1) Deliver novel tools for the study of human beta-cell development, function and survival, their modulation by potential therapeutic compounds, and for <i>in vivo</i> beta-cell imaging.<br>(2) Deliver biomarkers for the diagnosis and prognosis of beta-cell failure and for monitoring diabetes progression and treatment.<br>(3) Deliver knowledge on novel molecular pathways and sites |

|                                                                                                            |                |                                                                                                                                |                          |        |                                                                                                                                                                                                                                                                                                 |
|------------------------------------------------------------------------------------------------------------|----------------|--------------------------------------------------------------------------------------------------------------------------------|--------------------------|--------|-------------------------------------------------------------------------------------------------------------------------------------------------------------------------------------------------------------------------------------------------------------------------------------------------|
|                                                                                                            |                |                                                                                                                                |                          |        | that control beta-cell life and death as well as mass and function.                                                                                                                                                                                                                             |
| <b>DIRECT:</b><br>Diabetes research on patient stratification<br>(closed)                                  | IMI 1 – Call 3 | IMI Funding<br>(21 388 643)<br><br>EFPIA in kind<br>(18 816 527)<br><br>Other<br>(6 278 957)<br><br>Total Cost:<br>46 484 127€ | 01/02/2012 to 31/07/2019 | 115317 | (1) Identify the subtypes of type 2 diabetes patients.<br>(2) Identify and validate biomarkers associated with different subtypes of type 2 diabetes and different rates of disease progression.<br>(3) Determine the most appropriate treatments for each subtype of type 2 diabetes patients. |
| <b>StemBANCC:</b><br>Stem cells for biological assays of novel drugs and predictive toxicology<br>(closed) | IMI 1 – Call 4 | IMI Funding<br>(26 000 000)<br><br>EFPIA in kind<br>(20 761 386)<br><br>Other<br>(8 249 094)<br><br>Total Cost:                | 01/10/2012 to 31/03/2018 | 115439 | (1) Generate high-quality human induced pluripotent stem cell lines to study a range of chronic diseases (peripheral neuropathies, neurodegenerative disorders, neurodysfunctional disorders, diabetes)                                                                                         |

|                                                                            |                |                                                                                                                                    |                             |        |                                                                                                                                                                                                                                                                                                                    |
|----------------------------------------------------------------------------|----------------|------------------------------------------------------------------------------------------------------------------------------------|-----------------------------|--------|--------------------------------------------------------------------------------------------------------------------------------------------------------------------------------------------------------------------------------------------------------------------------------------------------------------------|
|                                                                            |                | 55 010 480€                                                                                                                        |                             |        | and test for drug efficacy and safety.<br>(2) Characterize iPS cell lines in terms of their genetic, protein, and metabolic profiles.                                                                                                                                                                              |
| <b>EMIF:</b><br><br>European Medical Information Framework<br><br>(closed) | IMI 1 – Call 4 | IMI Funding<br>(24 356 096)<br><br>EFPIA in kind<br>(24 354 503)<br><br>Other<br>(7 073 712)<br><br>Total Cost:<br><br>55 784 311€ | 01/01/2013 to<br>30/06/2018 | 115372 | (1) Develop a common information framework of patient-level data that will link up and facilitate access to diverse medical and research data source.<br>(2) Identify predictors of metabolic complications in obesity.<br>(3) Identify predictors of Alzheimer's disease in the pre-clinical and prodromal phase. |
| <b>EBiSC:</b><br><br>European Bank for induced                             | IMI 1 – Call 8 | IMI Funding<br>(21 840 380)                                                                                                        | 01/01/2014 to               | 115582 | (1) Establish a European iPS cell bank that will be                                                                                                                                                                                                                                                                |

|                                                                                                                                                                                           |                |                                                                                                                                                                            |                          |        |                                                                                                                                                                                                                                                                                                                              |
|-------------------------------------------------------------------------------------------------------------------------------------------------------------------------------------------|----------------|----------------------------------------------------------------------------------------------------------------------------------------------------------------------------|--------------------------|--------|------------------------------------------------------------------------------------------------------------------------------------------------------------------------------------------------------------------------------------------------------------------------------------------------------------------------------|
| pluripotent Stem Cells<br>(closed)                                                                                                                                                        |                | EFPIA in kind<br>(7 167 072)<br><br>Other<br>(5 320 406)<br><br>Total Cost:<br><br>34 327 858€                                                                             | 31/12/2017               |        | the 'go-to' resource for the characterisation, storage and distribution of high-quality iPS cells.                                                                                                                                                                                                                           |
| <b>INNODIA:</b><br>Translational approaches to disease modifying therapy of type 1 diabetes: an innovative approach towards understanding and arresting type 1 diabetes.<br><br>(ongoing) | IMI 2 – Call 1 | IMI Funding<br>(17 630 000)<br><br>EFPIA in kind<br>(12 745 192)<br><br>Associated Partners<br>(9 164 968)<br><br>Other<br>(633 000)<br><br>Total Cost:<br><br>40 173 160€ | 01/11/2015 to 31/10/2022 | 115797 | (1) Advance the understanding of type 1 diabetes and address the lack of tools and technologies that will allow clinicians to predict, evaluate and prevent the onset and progression of type 1 diabetes.<br>(2) Perform clinical intervention studies leading to novel therapies for preventing and curing type 1 diabetes. |
| <b>RHAPSODY:</b><br>Assessing risk                                                                                                                                                        | IMI 2 – Call 3 | IMI Funding                                                                                                                                                                | 01/04/2016 to            | 115881 | (1) Understand the factors that drive the                                                                                                                                                                                                                                                                                    |

|                                                                                                     |                   |                                                                                                                                                              |                             |        |                                                                                                                                                                                                                                                                                                                     |
|-----------------------------------------------------------------------------------------------------|-------------------|--------------------------------------------------------------------------------------------------------------------------------------------------------------|-----------------------------|--------|---------------------------------------------------------------------------------------------------------------------------------------------------------------------------------------------------------------------------------------------------------------------------------------------------------------------|
| and progression of prediabetes and type 2 diabetes to enable disease modification.<br><br>(ongoing) |                   | (8 130 000)<br><br>EFPIA in kind<br><br>(8 371 626)<br><br>Other<br><br>(2 189 500)<br><br>Total Cost:<br><br>18 691 126€                                    | 31/03/2020                  |        | progression of pre-diabetes to diabetes and the deterioration of the condition of people with diabetes.<br><br>(2) Develop novel biomarkers to refine diagnosis leading to better patient stratification, promote prevention, and support innovative drug discovery for personalized management of type 2 diabetes. |
| <b>BEAT-DKD:</b><br><br>Biomarker enterprise to attack DKD<br><br>(ongoing)                         | IMI 2 –<br>Call 5 | IMI Funding<br><br>(15 085 937)<br><br>EFPIA in kind<br><br>(13 360 968)<br><br>Associated Partners<br><br>(1 850 999)<br><br>Total Cost:<br><br>30 297 904€ | 01/09/2016 to<br>31/08/2021 | 115974 | (1) Provide a holistic systems medicine view of the pathogenesis DKD to identify targetable mechanisms and pathways underlying initiation and progression of DKD, applying a novel sub-                                                                                                                             |

|                                                                                                       |                |                                                                                                                          |                                 |        |                                                                                                                                                                                                                                                                                                                                              |
|-------------------------------------------------------------------------------------------------------|----------------|--------------------------------------------------------------------------------------------------------------------------|---------------------------------|--------|----------------------------------------------------------------------------------------------------------------------------------------------------------------------------------------------------------------------------------------------------------------------------------------------------------------------------------------------|
|                                                                                                       |                |                                                                                                                          |                                 |        | <p>classification of diabetes.</p> <p>(2) Identify and validate biomarkers of disease progression and treatment responses representing the first steps towards precision medicine in the management of DKD.</p>                                                                                                                              |
| <p><b>LITMUS:</b></p> <p>Liver Investigation: Testing Marker Utility in Steatohepatitis (ongoing)</p> | IMI 2 – Call 9 | <p>IMI Funding (15 797 881)</p> <p>EFPIA in kind (24 180 663)</p> <p>Other (7 302 863)</p> <p>Total Cost 47 281 407€</p> | <p>01/11/2017 to 31/10/2022</p> | 777377 | <p>(1) Develop, robustly validate and advance towards regulatory qualification biomarkers that diagnose, risk stratify and/or monitor NAFLD and NASH progression and fibrosis stage.</p> <p>(2) Develop and validate imaging techniques that will allow doctors and researchers to rapidly and easily diagnose the severity of patients’</p> |

|                                                                                               |                 |                                                                                                                                  |                             |        |                                                                                                                                                                                                                                                                                                                                                                                             |
|-----------------------------------------------------------------------------------------------|-----------------|----------------------------------------------------------------------------------------------------------------------------------|-----------------------------|--------|---------------------------------------------------------------------------------------------------------------------------------------------------------------------------------------------------------------------------------------------------------------------------------------------------------------------------------------------------------------------------------------------|
|                                                                                               |                 |                                                                                                                                  |                             |        | disease and monitor changes in patients' livers.                                                                                                                                                                                                                                                                                                                                            |
| <b>Hypo-RESOLVE:</b><br>Hypoglycaemia<br>- REdefining SOLutions for better liVEs<br>(ongoing) | IMI 2 – Call 10 | IMI Funding<br>(13 450 057)<br>EFPIA in kind<br>(10 316 000)<br>Associated Partners<br>(3 008 525)<br>Total Cost:<br>26 774 583€ | 01/05/2018 to<br>30/04/2022 | 777460 | (1) Provide researchers and clinicians with more validated data about the condition by creating a sustainable clinical database, by conducting studies to better understand the underlying mechanisms of hypoglycaemia, by conducting a series of statistical analyses to define predictors and consequences of hypoglycaemia, and by calculating the financial cost in European countries. |
| <b>IM2PACT:</b><br>Investigating mechanisms and                                               | IMI 2 – Call 12 | IMI Funding<br>(9 000 000)                                                                                                       | 01/01/2019 to               | 807015 | (1) Advance the understanding of the blood-brain                                                                                                                                                                                                                                                                                                                                            |



|                                                                   |                |                                                                    |                          |        |                                                                                                                                                                                                                                                                                                                                                                                                          |
|-------------------------------------------------------------------|----------------|--------------------------------------------------------------------|--------------------------|--------|----------------------------------------------------------------------------------------------------------------------------------------------------------------------------------------------------------------------------------------------------------------------------------------------------------------------------------------------------------------------------------------------------------|
| models predictive of accessibility of therapeutics into the brain |                | EFPIA in kind<br>(8 410 136)<br><br>Total Cost:<br><br>17 410 136€ | 31/12/2023               |        | barrier to facilitate the development of more effective treatments for a range of neurological and metabolic disorders;<br>(2) Develop better models of the BBB so that researchers can study it more easily;<br>(3) Investigate the biology of the BBB in both health and disease, and the transport routes across it;<br>(4) Develops innovative systems capable of delivering medicines to the brain. |
| <b>CARDIATEAM:</b><br>Cardiomyopathy in type 2 diabetes mellitus  | IMI2 – Call 13 | IMI Funding<br>(6 700 000)<br>EFPIA in kind<br>(6 000 000)         | 01/03/2019 to 29/02/2024 | 821508 | (1) Determine how type 2 diabetes represents a central mechanism contributing to the pathogenesis and                                                                                                                                                                                                                                                                                                    |

|           |  |                                                              |  |  |                                                                                                                                                          |
|-----------|--|--------------------------------------------------------------|--|--|----------------------------------------------------------------------------------------------------------------------------------------------------------|
| (ongoing) |  | Other<br><br>(182 500)<br><br>Total Cost:<br><br>12 882 500€ |  |  | progression of<br>diabetic<br>cardiomyopathy.<br>(2) Determine<br>how distinct<br>diabetic<br>cardiomyopathy is<br>from other forms of<br>heart failure. |
|-----------|--|--------------------------------------------------------------|--|--|----------------------------------------------------------------------------------------------------------------------------------------------------------|
